# Supplementary material for: A novel mixed valent CuII–CuI 2D framework made of a hydrazone and μ-SCN bridged metallacyclic loops cross-linked by μ3-SCN chains
Source: Royal Society of Chemistry journal article supplement (doi:10.1039/c2dt31666h), 2012-01-01
Supplement: c2dt31666h.pdf [file c2dt31666h.pdf]

### Electronic Supplementary Information

## A Novel Mixed Valent $\text{Cu}^{\text{II}}$ - $\text{Cu}^{\text{I}}$ 2D Framework Made of a Hydrazone and $\mu$ -SCN Bridged Metallacyclic Loops Cross-linked by $\mu_3$ -SCN Chains

D. Sadhukhan, C. Rizzoli, E. Garribba, C. J. Gómez-García, A. Yahia-Ammar, L. J. Charbonnière and S. Mitra

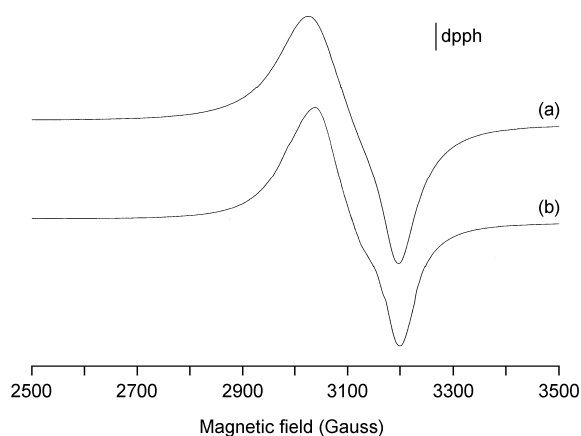

Figure F1. X-band EPR spectra of the polycrystalline complex: (a) at RT, (b) at 100 K. Diphenylpicrylhydrazyl (dpph) is the standard field marker ( $g = 2.0036$ ).

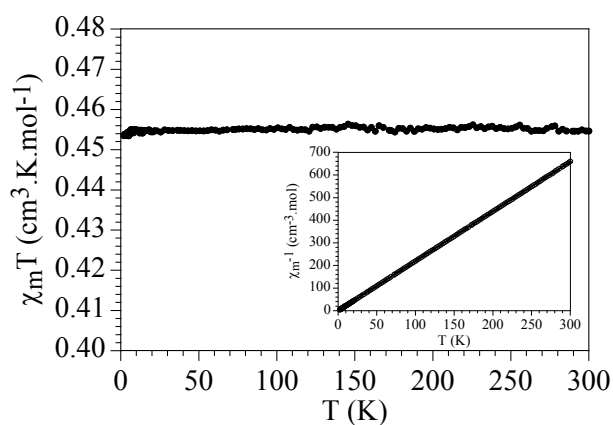

Figure F2. Thermal variation of the  $\chi_m T$  product for the complex. Inset shows the Curie plot. Solid line is the best fit to the Curie-Weiss law

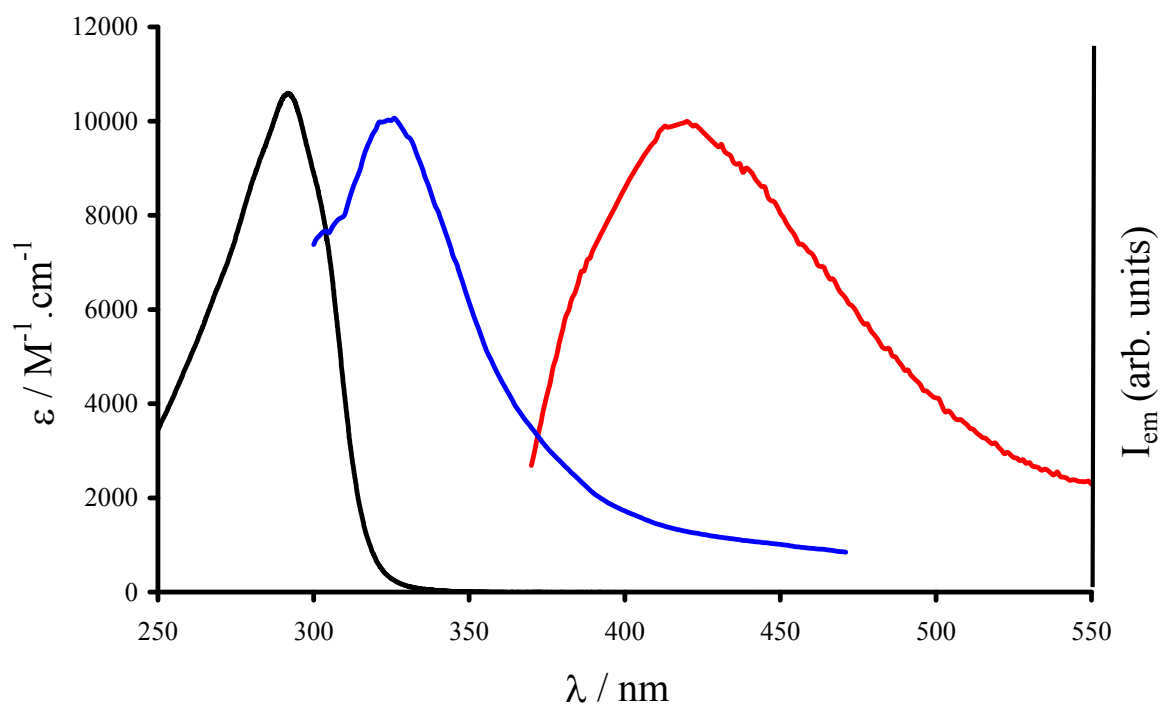

Figure F3. UV-Vis absorption spectrum of LH in ethanol ( $c = 1.18 \times 10^{-4} \text{ M}$ , black) and emission spectra of LH in ethanol ( $\lambda_{\text{exc}} = 270 \text{ nm}$ , blue) and of the mixed valent copper complex in the solid state ( $\lambda_{\text{exc}} = 338 \text{ nm}$ , red)

Table T1 Bond length (Å) and bond angles (°) for the complex

| Bond lengths          |            | Bond angles                            |            |
|-----------------------|------------|----------------------------------------|------------|
| Cu1-N1                | 2.015(4)   | N1-Cu1-N2                              | 80.76(14)  |
| Cu1-N2                | 1.925(3)   | N1-Cu1-N4                              | 102.58(16) |
| Cu1-N4                | 1.931(4)   | N2-Cu1-N4                              | 164.90(16) |
| Cu1-O1                | 1.983(3)   | O1-Cu1-N1                              | 158.00(14) |
| Cu1-S1                | 2.6444(17) | O1-Cu1-N2                              | 78.62(13)  |
| Cu2-N3 <sup>ii</sup>  | 2.033(3)   | O1-Cu1-N4                              | 95.47(15)  |
| Cu2-N3 <sup>iv</sup>  | 2.033(3)   | S1-Cu1-O1                              | 93.41(11)  |
| Cu2-S2                | 2.4249(14) | S1-Cu1-N1                              | 96.39(12)  |
| Cu2-S2 <sup>v</sup>   | 2.4249(14) | S1-Cu1-N2                              | 96.20(11)  |
| Cu3-N5 <sup>i</sup>   | 1.938(5)   | S1-Cu1-N4                              | 98.03(13)  |
| Cu3-N5 <sup>iii</sup> | 1.938(5)   | N3 <sup>ii</sup> -Cu2-N3 <sup>iv</sup> | 116.10(13) |
| Cu3-S2                | 2.4292(15) | S2-Cu2-S2 <sup>v</sup>                 | 107.05(5)  |
| Cu3-S2 <sup>v</sup>   | 2.4292(15) | S2-Cu2-N3 <sup>ii</sup>                | 101.51(11) |
| Cu1...Cu2             | 5.5938(6)  | S2-Cu2-N3 <sup>iv</sup>                | 115.44(10) |
| Cu1...Cu3             | 5.8449(6)  | S2 <sup>v</sup> -Cu2-N3 <sup>ii</sup>  | 115.44(10) |
| Cu2...Cu3             | 2.8903(12) | S2 <sup>v</sup> -Cu2-N3 <sup>iv</sup>  | 101.51(11) |
|                       |            | N5 <sup>i</sup> -Cu3-N5 <sup>iii</sup> | 116.7(2)   |
|                       |            | S2-Cu3-S2 <sup>v</sup>                 | 106.77(6)  |
|                       |            | S2-Cu3-N5 <sup>i</sup>                 | 109.17(17) |
|                       |            | S2-Cu3-N5 <sup>iii</sup>               | 107.32(16) |
|                       |            | S2 <sup>v</sup> -Cu3-N5 <sup>i</sup>   | 107.32(16) |
|                       |            | S2 <sup>v</sup> -Cu3-N5 <sup>iii</sup> | 109.17(17) |

Symmetry codes: (i) 1/2-x, 1/2-y, 1-z; (ii) 1/2-x, 3/2-y, 1-z; (iii) 1/2+x, 1/2-y, 1/2+z; (iv) 1/2+x, 3/2-y, 1/2+z; (v) 1-x, y, 3/2-z.

Table T2 Bond valence values for copper centers in the complex

| Bond type             | Bond distance<br>( $R_{ij}$ ) (Å) | $R_0$<br>(Å) | $b$<br>(Å) | Bond valence ( $S_{ij}$ ) |        |        | BVS ( $N_i$ ) |
|-----------------------|-----------------------------------|--------------|------------|---------------------------|--------|--------|---------------|
|                       |                                   |              |            | Cu1                       | Cu2    | Cu3    |               |
| Cu1-N1                | 2.015(4)                          | 1.713        | 0.37       | 0.4421                    |        |        | 2.1597        |
| Cu1-N2                | 1.925(3)                          | 1.713        | 0.37       | 0.5638                    |        |        |               |
| Cu1-N4                | 1.931(4)                          | 1.713        | 0.37       | 0.5548                    |        |        |               |
| Cu1-O1                | 1.983(3)                          | 1.655        | 0.37       | 0.4121                    |        |        |               |
| Cu1-S1                | 2.6444(17)                        | 2.024        | 0.37       | 0.1869                    |        |        |               |
| Cu2-N3 <sup>ii</sup>  | 2.033(3)                          | 1.571        | 0.37       |                           | 0.2869 |        | 0.9788        |
| Cu2-N3 <sup>iv</sup>  | 2.033(3)                          | 1.571        | 0.37       |                           | 0.2869 |        |               |
| Cu2-S2                | 2.4249(14)                        | 1.834        | 0.37       |                           | 0.2025 |        |               |
| Cu2-S2 <sup>v</sup>   | 2.4249(14)                        | 1.834        | 0.37       |                           | 0.2025 |        |               |
| Cu3-N5 <sup>i</sup>   | 1.938(5)                          | 1.571        | 0.37       |                           |        | 0.3708 | 1.1418        |
| Cu3-N5 <sup>iii</sup> | 1.938(5)                          | 1.571        | 0.37       |                           |        | 0.3708 |               |
| Cu3-S2                | 2.4292(15)                        | 1.834        | 0.37       |                           |        | 0.2001 |               |
| Cu3-S2 <sup>v</sup>   | 2.4292(15)                        | 1.834        | 0.37       |                           |        | 0.2001 |               |
